# Supplementary material for: Reduced-complexity air quality intervention modelling over China: development of the InMAPv1.6.1-China and comparison with the CMAQv5.2 model
Source: Copernicus journal article supplement (doi:10.5194/gmd-2021-87), 2021-04-26
Supplement: Supplementary file 1 [file gmd-2021-87-supplement.pdf]

1 **Supporting information for “Reduced-complexity air**  
2 **quality intervention modelling over China: development**  
3 **of the InMAPv1.6.1-China and comparison with the**  
4 **CMAQv5.2 model”**

5 Ruili Wu<sup>1</sup>, Christopher W. Tessum<sup>2</sup>, Yang Zhang<sup>3</sup>, Chaopeng Hong<sup>4</sup>, Yixuan Zheng<sup>5</sup>,  
6 Qiang Zhang<sup>1</sup>

7 <sup>1</sup>Ministry of Education Key Laboratory for Earth System Modelling, Department of Earth System  
8 Science, Tsinghua University, Beijing 100084, China

9 <sup>2</sup>Department of Civil and Environmental Engineering, University of Illinois at Urbana-Champaign,  
10 Urbana, Illinois 61801, United States

11 <sup>3</sup>Department of Civil and Environmental Engineering, Northeastern University, Boston, Massachusetts  
12 02115, United States

13 <sup>4</sup>Department of Earth System Science, University of California, Irvine, California 92602, United States

14 <sup>5</sup>Center of Air Quality Simulation and System Analysis, Chinese Academy of Environmental Planning,  
15 Beijing 100012, China

16 *Correspondence to:* Ruili Wu (wurl15@mails.tsinghua.edu.cn)

17

18

19

20

21

22

23

24

25

26

27 **Table S1 Model configurations in WRFv3.8.**

| Parameter                      | Configuration                                                                                       |
|--------------------------------|-----------------------------------------------------------------------------------------------------|
| Simulation Period              | Dec. 20, 2016-Dec. 31, 2017                                                                         |
| Domain                         | East Asia (West-to-East:178 × North-to-South:133)                                                   |
| Horizontal resolution          | 36 km×36 km                                                                                         |
| Vertical resolution            | 23 sigma layers from surface to tropopause (100 mb)                                                 |
| Meteorological IC and BC       | Reanalysis data from the National Centers for Environmental Prediction<br>Final Analysis (NCEP-FNL) |
| Shortwave radiation            | New Goddard (Chou et al., 1998)                                                                     |
| Longwave radiation             | RRTM (Mlawer et al., 1997)                                                                          |
| Land surface data              | USGS                                                                                                |
| Surface layer                  | Pleim-Xiu (Xiu and Pleim et al., 2001)                                                              |
| Planetary boundary layer model | ACM2 (Pleim et al., 2007)                                                                           |
| Cumulus Parameterization       | Kain-Fritsch (Kain et al., 2004)                                                                    |
| Cloud microphysics             | WSM6                                                                                                |
| Analysis nudging               | Temperature and water vapor mixing (above PBL);<br>Wind (in and above PBL)                          |
| Observational nudging          | Temperature, water vapor mixing and wind (in and above PBL)                                         |
| Soil nudging                   | Include soil moisture and temperature                                                               |

28

29

30

31

32

33

34 **Table S2 Model configurations in CMAQv5.2.**

| Parameter                               | Configuration                                                                                                                                                                         |
|-----------------------------------------|---------------------------------------------------------------------------------------------------------------------------------------------------------------------------------------|
| Simulation Period                       | Dec. 20, 2016-Dec. 31, 2017                                                                                                                                                           |
| Domain and spatial resolution           | East Asia (West-to-East:172 × North-to-South:127)<br>36 km× 36 km                                                                                                                     |
| Vertical resolution                     | 14 sigma levels from surface to tropopause. The values of sigma levels are 1.000, 0.995, 0.988,0.980, 0.970, 0.956, 0.938, 0.893, 0.839, 0.777, 0.702, 0.582, 0.400, 0.200 and 0.000. |
| IC and BC                               | GEOS-Chem simulation                                                                                                                                                                  |
| Gas-phase mechanism                     | CB05 gas-phase mechanism with active chlorine chemistry and updated toluene mechanism of (Whitten et al., 2010)                                                                       |
| Aqueous-phase mechanism                 | The updated mechanism of the RADM model (Walcek and Taylor et al., 1986; Chang et al., 1987)                                                                                          |
| Aerosol module                          | AERO6                                                                                                                                                                                 |
| Aerosol thermodynamics                  | ISORROPIA-II (Fountoukis and Nenes et al., 2007)                                                                                                                                      |
| Wind blown dust                         | Not included                                                                                                                                                                          |
| The lightning NO <sub>x</sub> emissions | Not included                                                                                                                                                                          |
| Biogenic emissions                      | MEGANv2.10 model                                                                                                                                                                      |
| Anthropogenic emissions                 | MEIC inventory for mainland of China emissions in 2017<br>MIX2010 inventory for the emissions at the region outside the China in East Asia                                            |

35

36

37

38

39 **Table S3 WRF evaluation**

| Variable  | Mean_ob | Mean_si | Sample | Cor |      | RMS |       | NMB   | NME   |
|-----------|---------|---------|--------|-----|------|-----|-------|-------|-------|
|           | s       | m       |        | r   | MB   | ME  | E     | (%)   | (%)   |
|           |         |         | 502728 | 0.9 | -    | 2.1 |       |       |       |
| TEMP (°C) | 15.03   | 14.36   | 8      | 4   | 0.67 | 8   | 3.07  | -6.07 | 19.95 |
| WSPD      |         |         | 485075 | 0.5 |      | 1.4 |       |       |       |
| (m/s)     | 2.70    | 3.04    | 3      | 9   | 0.34 | 8   | 2.03  | 12.43 | 55.39 |
|           |         |         | 501855 | 0.7 |      | 9.9 |       |       |       |
| RH (%)    | 69.26   | 73.40   | 7      | 9   | 4.14 | 6   | 13.28 | 6.12  | 14.53 |

40  
41  
42  
43  
44  
45  
46  
47  
48  
49  
50  
51  
52  
53  
54  
55  
56  
57  
58

59 **Table S4 CMAQ evaluation**

| Statistical metrics                 | PM <sub>2.5</sub> | SO <sub>2</sub> | NO <sub>2</sub> |
|-------------------------------------|-------------------|-----------------|-----------------|
| Data Pairs                          | 124476            | 124572          | 124659          |
| R                                   | 0.59              | 0.39            | 0.57            |
| Observed Mean (µg/m <sup>3</sup> )  | 45.86             | 18.52           | 32.96           |
| Simulated Mean (µg/m <sup>3</sup> ) | 42.12             | 17.69           | 28.39           |
| MB (µg/m <sup>3</sup> )             | -3.74             | -0.83           | -4.57           |
| RMSE (%)                            | 36.07             | 25.29           | 21.91           |
| NMB (%)                             | -8.16             | -4.47           | -13.87          |
| NME (%)                             | 50.03             | 77.15           | 51.02           |

60

61

62

63

64

65

66

67

68

69

70

71

72

73

74

75

76

77

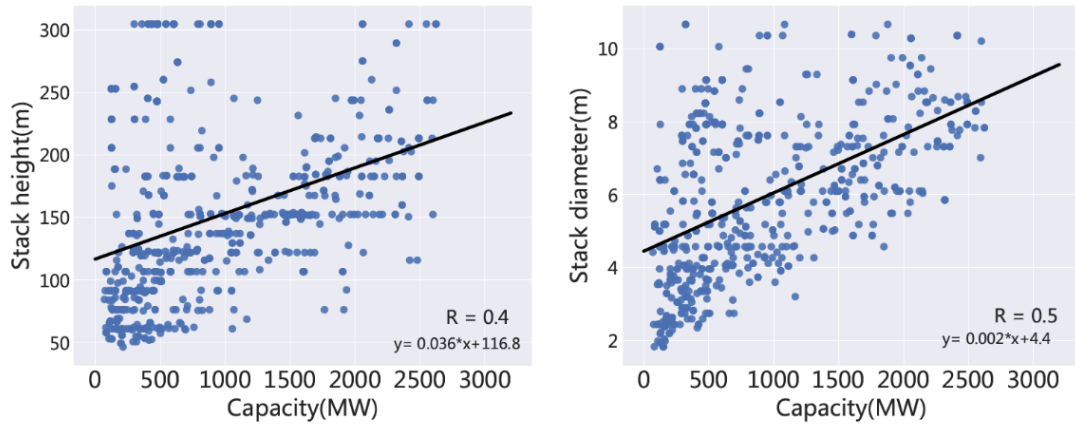

78

79 **Figure S1 Scatter plot and linear relationship of stack attribution and unit capacity of power plants based on**

80 **the coal-fired power plant data in 2011 from the national emission inventory in the United States. The stack**

81 **height and stack diameter are displayed in subplots (a) and (b), respectively.**

82

83

84

85

86

87

88

89

90

91

92

93

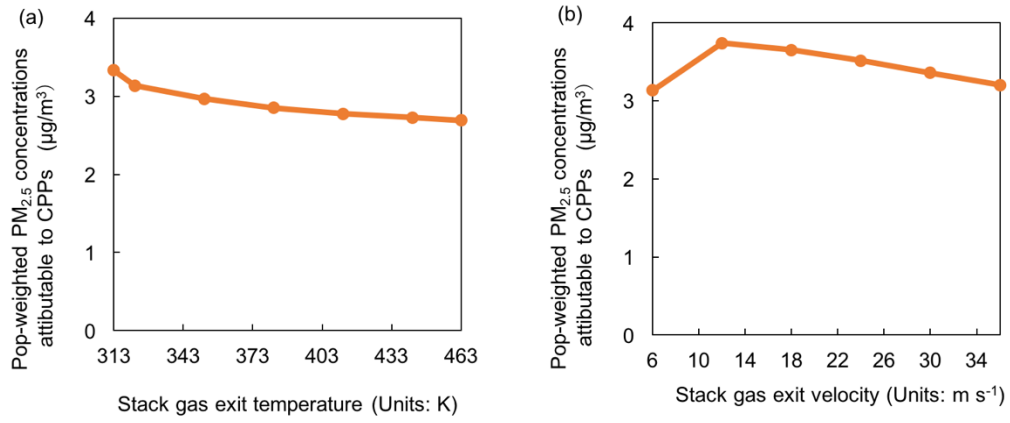

94

95 **Figure S2 Sensitivity results for two stack attributions of coal-fired power plants.** Panel (a) and (b) show the

96 impacts on concentrations of stack gas exit velocity (units: K) and stack gas exit temperature

97 (units: m s<sup>-1</sup>), respectively.

98

99

100

101

102

103

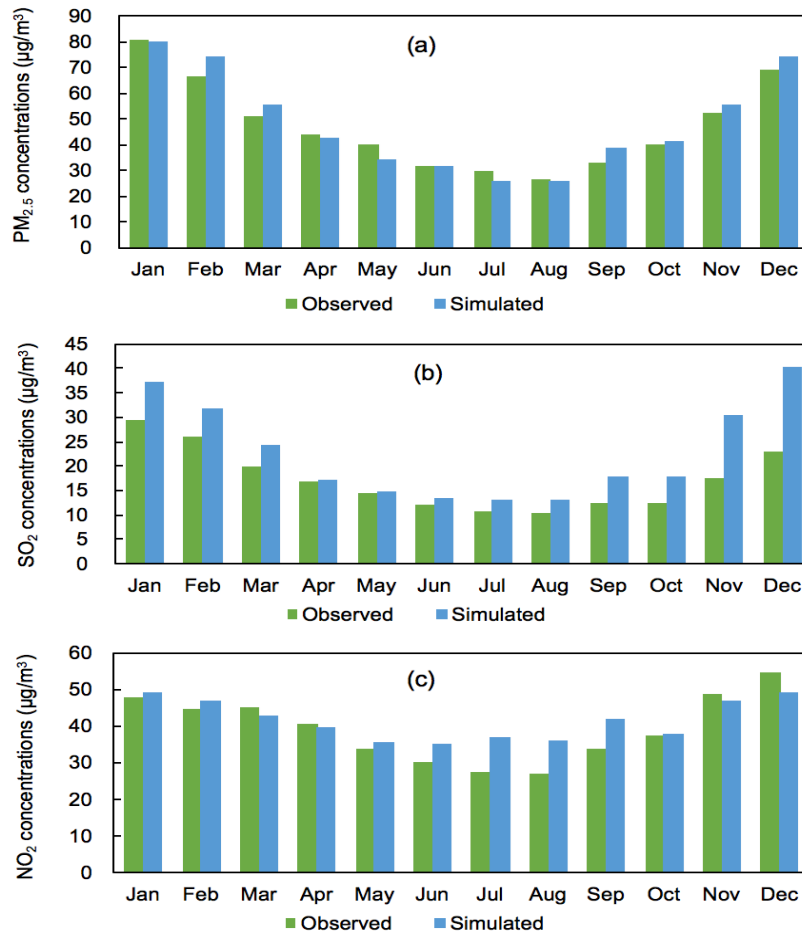

104

105 **Figure S3 Monthly variations in PM<sub>2.5</sub>, SO<sub>2</sub> and NO<sub>2</sub> concentrations simulated by the CMAQ model and**

106 **comparison with observations.**

107

108

109

110



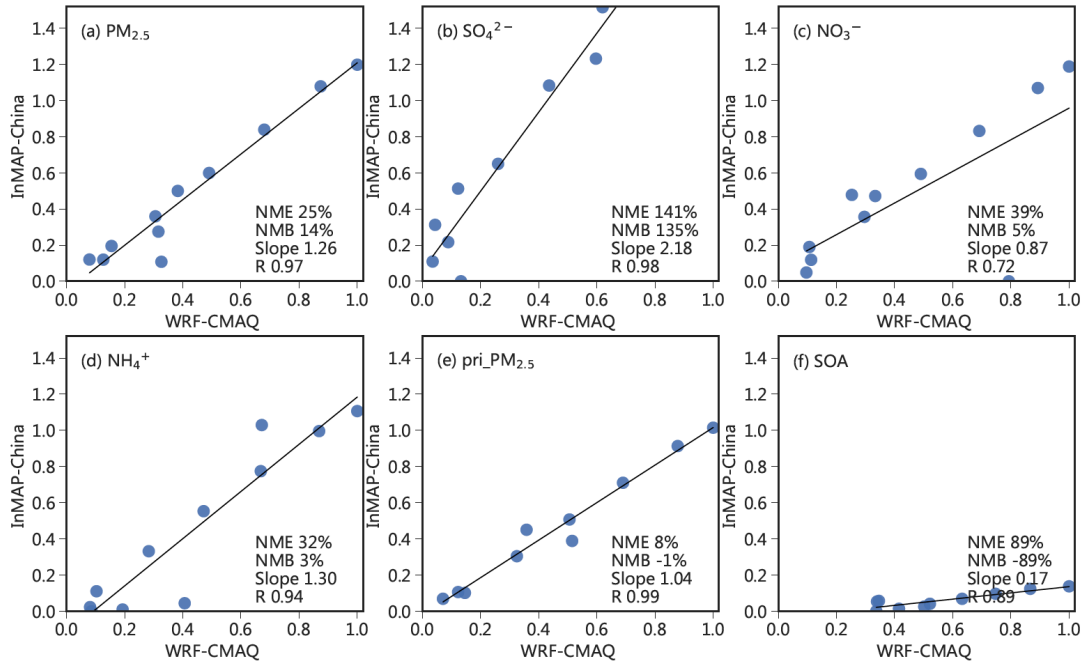

111

112 **Figure S4 Marginal change in population-weighted PM<sub>2.5</sub> concentrations and their composition over the BTH**

113 **region modelled by the InMAP-China and WRF-CMAQ models.** The population-weighted pollutant

114 concentration for each scenario is normalized using the largest value among all scenarios modelled by CMAQ.

115 Eleven dots represent the eleven scenarios, and the statistical metrics are labelled in the lower right corner for each

116 panel.

117

118

119

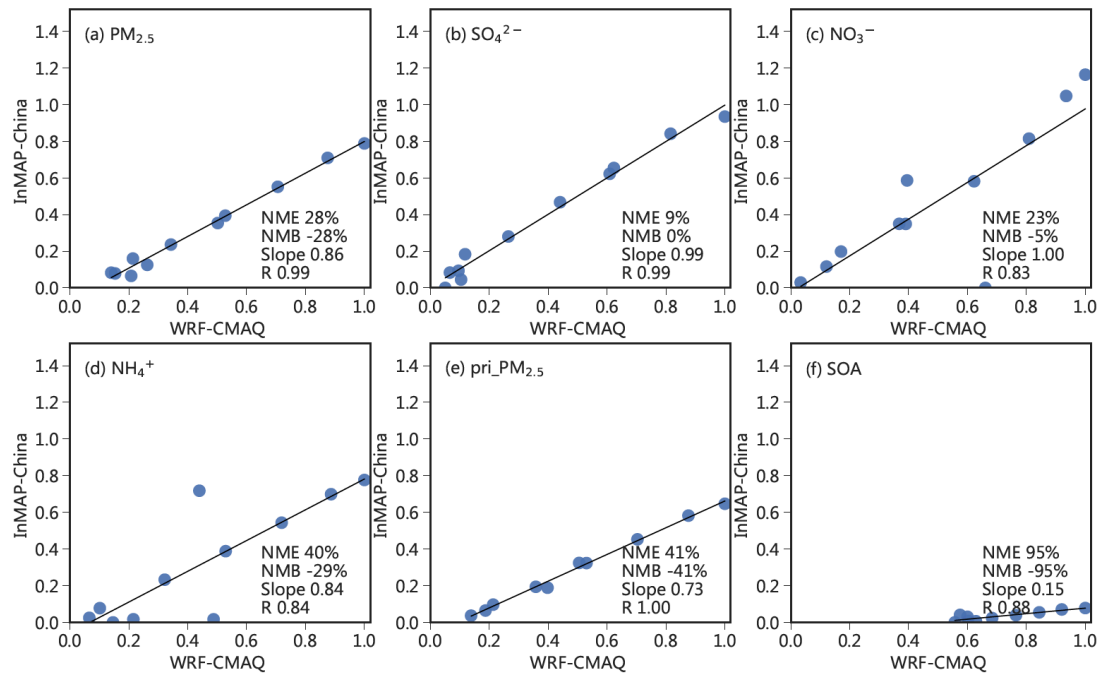

120

121 **Figure S5 Marginal change in population-weighted  $PM_{2.5}$  concentrations and their composition over the PRD**

122 **region modelled by the InMAP-China and WRF-CMAQ models.** The population-weighted pollutant

123 concentration for each scenario is normalized using the largest value among all scenarios modelled by the CMAQ.

124 The eleven dots represent the eleven scenarios, and the statistical metrics are labelled in the lower right corner for

125 each panel.

126

127

128

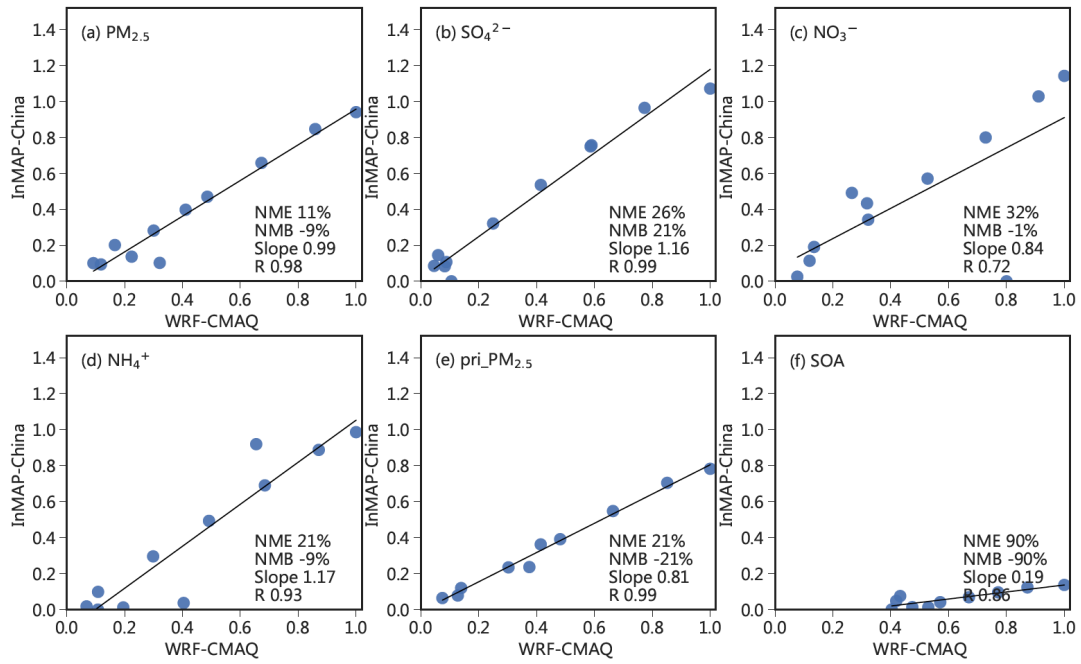

129

130

**Figure S6 Marginal change in population-weighted PM<sub>2.5</sub> concentrations and their composition over the YRD**

131

**region modelled by the InMAP-China and WRF-CMAQ models. The population-weighted air pollutant**

132

**concentration for each scenario is normalized using the largest value among all scenarios modelled by**

133

**CMAQ. Eleven dots represent the eleven scenarios, and the statistical metrics are labelled in the lower**

134

**right corner for each panel.**

135

136

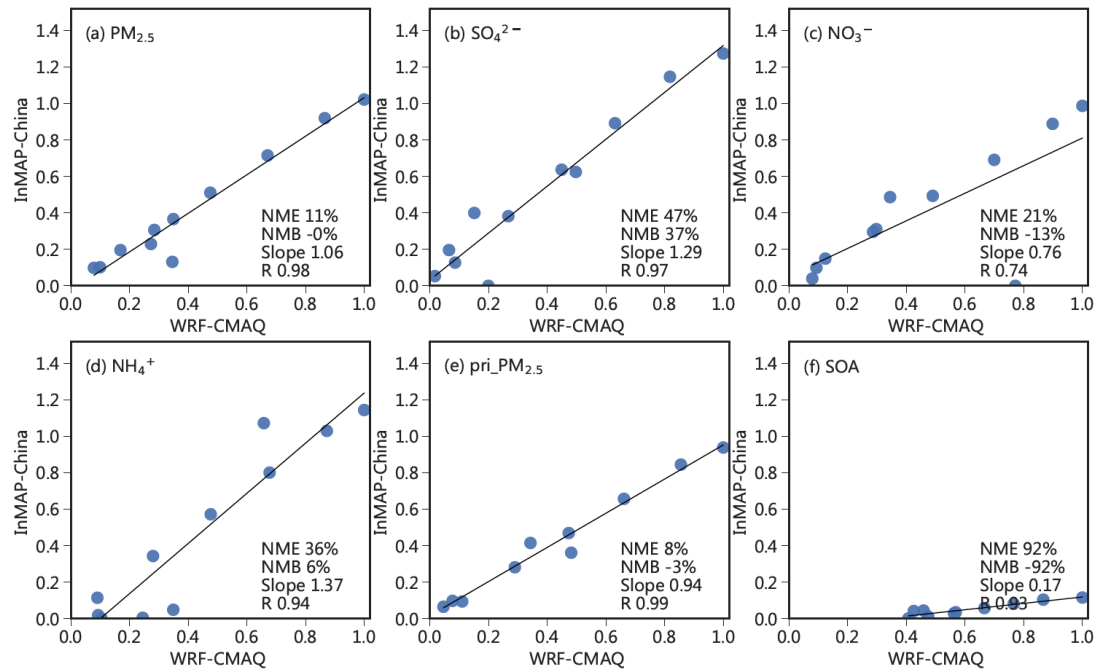

137

138 **Figure S7 Marginal change in population-weighted  $PM_{2.5}$  concentrations and their composition over the Fen**

139 **Wei Plain region modelled by the InMAP-China and WRF-CMAQ models. The population-weighted air**

140 **pollutant concentration for each scenario is normalized using the largest value among all scenarios**

141 **modelled by CMAQ. The eleven dots represent the eleven scenarios, and the statistical metrics are**

142 **labelled in the lower right corner for each panel.**

143
