# Supplementary material for: Reduced-complexity air quality intervention modelling over China: development of the InMAPv1.6.1-China and comparison with the CMAQv5.2 model
Source: Copernicus journal article supplement (doi:10.5194/gmd-2021-87), 2021-04-26
Supplement: Supplementary file [file gmd-2021-87-AC3-supplement.pdf]

## Response to Referee #1:

*Dear authors,*

*Checking your manuscript, they have come to my attention a couple of problems with the 'Code and Data Availability'.*

*You use here the InMAP model. In the code availability section, you mention its Github repository. This is confusing, as Github is not a suitable repository for long-term archival, and we can not accept it. However, you have archived in Zenodo the version 1.6.1 of InMAP that you use. This is fine. The problem here is that in Zenodo, you have relicensed the InMAP code under Creative Commons 4.0. CC-4.0 is compatible with the GPLv3 license of InMAP, but its use in a repository is strongly discouraged. When you submit the InMAP1.6.1 code, you can ask the Zenodo administrators to make available the GPLv3 license. Therefore, please:*

- Remove the mention to the Github repository for InMAP from the 'Code and Data availability section*
- Upload to Zenodo the full InMAP 1.6.1 under GPLv3*
- Change the license for your version for China of the code to the original GPLv3*

*Best regards,*

*Juan A. Añel*

*Geosc. Mod. Dev. Executive Editor*

[Response: Thanks for this valuable comment. We have deleted the mention to the Github repository for InMAP from the 'Code and Data availability section'. We have asked the Zenodo administrators to make the GPLv3 license available and wait for response.](#)
